# Supplementary material for: Analysis of NHEJ-Based DNA Repair after CRISPR-Mediated DNA Cleavage
Source: MDPI journal article supplement (doi:10.3390/ijms22126397), 2021-06-15
Supplement: s1 [file s1]

## **SUPPLEMENTARY MATERIALS**

### **Analysis of NHEJ-based DNA repair after CRISPR-mediated DNA cleavage**

#### **Table of Contents**

**Supplementary Figure S1.** The fraction of non-random 1-bp insertion.

**Supplementary Table S1.** Sequence of dsODN and target sites of each gene.

**Supplementary Table S2.** NHEJ accuracy at the two DSB ends in each gene.

**Supplementary Table S3.** Targeted sequence of each gene.

**Supplementary Table S4.** NHEJ accuracy in each gene.

**Supplementary Table S5.** The fraction of predictable 1-bp insertion among the total 1-bp insertion in the two human cell lines.

**Supplementary Figure S1. The fraction of non-random 1-bp insertion.** The fraction of 1-bp insertion which is identical to -4bp upstream of the PAM is diverse across the genes.

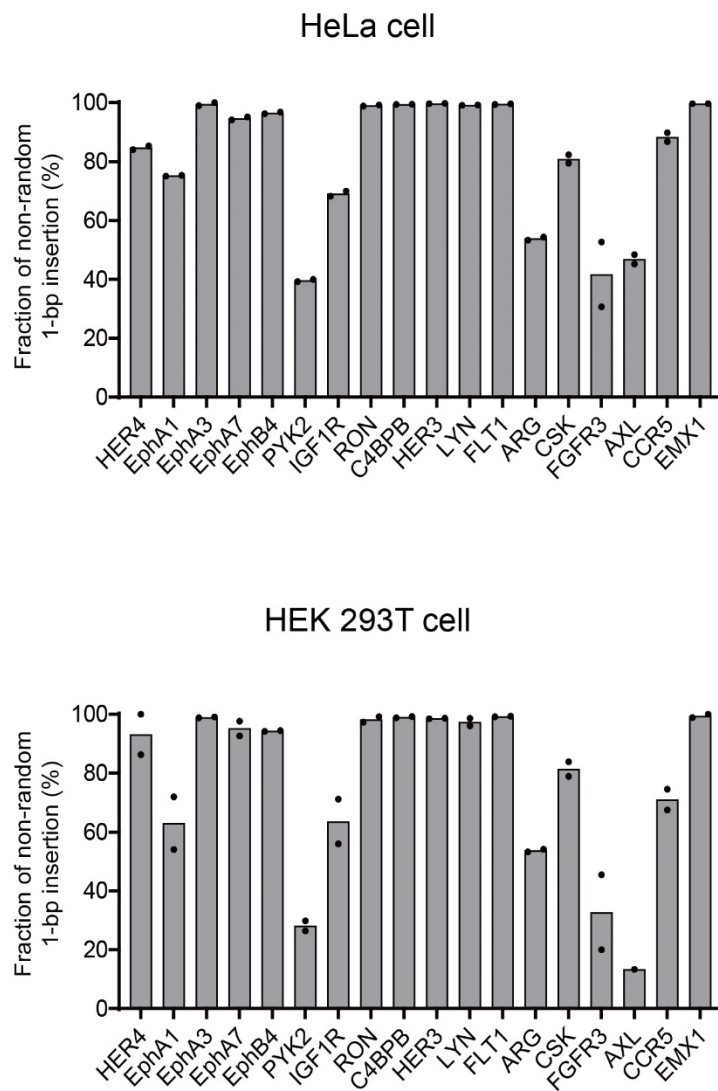

**Supplementary Table S1. Sequence of dsODN and target sites of each gene.**

| dsODN               |                | 5' - P-G*T*TAAATTGAGTTGTCATATGTTAATAACGGT*A*T - 3'<br>3' - C*A*AATTAACCAACAGTATACAATTATTGCCA*T*A - P - 5' |                          |        |
|---------------------|----------------|-----------------------------------------------------------------------------------------------------------|--------------------------|--------|
| Gene                |                | sgRNA                                                                                                     | Targeted sequence        | Strand |
| <i>HER4</i>         |                | 1                                                                                                         | CTTGGATTAAAGAACTTGACAGG  | -      |
|                     |                | 2                                                                                                         | TTATGAGGATCGATATGCCTTGG  | -      |
|                     |                | 3                                                                                                         | TCGTGGGACAAAACCTTTATGAGG | -      |
|                     |                | 4                                                                                                         | ATAATGCGTAAATTCTCCAGAGG  | +      |
|                     |                | 5                                                                                                         | AGTCACAGGCTACGTGTTAGTGG  | -      |
|                     |                | 6                                                                                                         | CAATTCTTTAGAATATGATATGG  | -      |
| <i>EphA1</i>        |                | 1                                                                                                         | AAGGTCTCCTTGACGCCAGAGG   | +      |
|                     |                | 2                                                                                                         | GAAACTCTTGCACTCCCGCACGG  | +      |
|                     |                | 3                                                                                                         | ACTGCAGCTCCACGTGGACGCGG  | +      |
|                     |                | 4                                                                                                         | GCTCCAATTGGATCTACCGCGGG  | -      |
|                     |                | 5                                                                                                         | GACGCAGAGACACTGACCACTGG  | -      |
|                     |                | 6                                                                                                         | TACCAGGACTGCCCAATGCAAGG  | -      |
| <i>EphB4</i>        |                | 1                                                                                                         | GTGGGTTGCCCTAATTTGATGGG  | -      |
|                     |                | 2                                                                                                         | AAACACGGACAGTATCTCATCGG  | -      |
|                     |                | 3                                                                                                         | GCAGAATATTCGGACAAACACGG  | -      |
|                     |                | 4                                                                                                         | GCTCTGCTTCCTGTAGCCGATGG  | +      |
|                     |                | 5                                                                                                         | CTGAGTCACACATCTTTATGAGG  | +      |
|                     |                | 6                                                                                                         | TTATGAGGCACACACACCAAGG   | +      |
| <i>EMX1</i>         |                | 1                                                                                                         | GACTGAGGCTACATAGGGTTAGG  | -      |
|                     |                | 2                                                                                                         | GCCGTTTGTACTTTGTCTCCGG   | -      |
|                     |                | 3                                                                                                         | GAGTCCGAGCAGAAGAAGAAGGG  | +      |
|                     |                | 4                                                                                                         | AGGGCTCCCATCACATCAACCGG  | +      |
|                     |                | 5                                                                                                         | CACGAAGCAGGCCAATGGGGAGG  | +      |
|                     |                | 6                                                                                                         | GTCACCTCCAATGACTAGGGTGG  | +      |
| Duplicated sequence | Chr3:75395213  | 1                                                                                                         | GCAGCTCTATGGAGGCCTGGNGG  | +      |
|                     | Chr5:28926841  | 2                                                                                                         |                          | +      |
|                     | Chr1:144720581 | 3                                                                                                         |                          | +      |
|                     | Chr13:25017428 | 4                                                                                                         |                          | +      |
|                     | Chr9:40883645  | 5                                                                                                         |                          | +      |

\* represents phosphorothioate internucleotide linkages.

**Supplementary Table S2. NHEJ accuracy at the two DSB ends in each gene.**

| sgRNA              | <i>HER4</i>   |               | <i>EphA1</i>   |                | <i>EphB4</i>   |                | <i>EMX1</i>   |               |
|--------------------|---------------|---------------|----------------|----------------|----------------|----------------|---------------|---------------|
|                    | PAM-distal    | PAM-proximal  | PAM-distal     | PAM-proximal   | PAM-distal     | PAM-proximal   | PAM-distal    | PAM-proximal  |
| 1                  | 56.1%         | 35.8%         | 83.9%          | 46.3%          | 51.8%          | 82.9%          | 42.5%         | 39.1%         |
| 2                  | 59.1%         | 60.8%         | 88.0%          | 2.5%           | 79.5%          | 12.0%          | 84.5%         | 40.6%         |
| 3                  | 52.7%         | 31.4%         | 22.7%          | 10.2%          | 5.3%           | 7.5%           | 47.3%         | 2.6%          |
| 4                  | 95.4%         | 51.2%         | 60.7%          | 92.5%          | 79.2%          | 63.0%          | 89.8%         | 70.3%         |
| 5                  | 35.0%         | 87.5%         | 64.3%          | 90.0%          | 84.5%          | 52.7%          | 81.5%         | 54.7%         |
| 6                  | 69.7%         | 57.8%         | 25.0%          | 0.0%           | 78.0%          | 34.6%          | 75.8%         | 52.6%         |
| Avg. NHEJ accuracy | 61.3<br>±8.2% | 54.1<br>±8.2% | 57.4<br>±11.5% | 40.3<br>±17.5% | 63.0<br>±12.5% | 42.1<br>±12.1% | 70.2<br>±8.2% | 43.3<br>±9.4% |

**Supplementary Table S3. Targeted sequence of each gene.**

| <b>Gene</b>  | <b>Targeted sequence</b> | <b>Strand</b> | <b>Location</b> |
|--------------|--------------------------|---------------|-----------------|
| <i>HER4</i>  | ATAATGCGTAAATTCTCCAGAGG  | +             | Chr2            |
| <i>EphA1</i> | GCTCCAATTGGATCTACCGCGGG  | -             | Chr7            |
| <i>EphA3</i> | TTGTCGACCAGGTTTCTACAAGG  | +             | Chr3            |
| <i>EphA7</i> | CACCTGGTATGTTCGTATCGGGG  | +             | Chr6            |
| <i>EphB4</i> | GCAGAATATTCGGACAAACACGG  | -             | Chr7            |
| <i>PYK2</i>  | GGTCCTGAATCGTATTCTTGGGG  | +             | Chr8            |
| <i>IGF1R</i> | TCAGTACGCCGTTTACGTCAAGG  | +             | Chr15           |
| <i>RON</i>   | GTCATCGGGCCGGTTATGGTGGG  | +             | Chr3            |
| <i>C4BPB</i> | AATGACCACTACATCCTCAAGGG  | +             | Chr1            |
| <i>HER3</i>  | ACCATTGCCCAACCTCCGCGTGG  | +             | Chr12           |
| <i>LYN</i>   | TTAATCATGTCGCTGATACAGGG  | -             | Chr8            |
| <i>FLT1</i>  | AAAATAAGAGAGCTTCCGTAAGG  | -             | Chr13           |
| <i>ARG</i>   | TCCATCTCGCTCAGGTACGAGGG  | -             | Chr1            |
| <i>CSK</i>   | CTGACCGACCCCTAGACCGCAGG  | -             | Chr15           |
| <i>FGFR3</i> | CGGCAACTACACCTGCGTCGTGG  | +             | Chr4            |
| <i>AXL</i>   | GTCCCGTGTCGAAAGCTGCAGG   | -             | Chr19           |
| <i>CCR5</i>  | TGACATCAATTATTATACATCGG  | +             | Chr3            |
| <i>EMX1</i>  | GAGTCCGAGCAGAAGAAGAAGGG  | +             | Chr2            |

**Supplementary Table S4. NHEJ accuracy in each gene.**

| Gene               | HeLa cell   |              | HEK 293T cell |              |
|--------------------|-------------|--------------|---------------|--------------|
|                    | PAM-distal  | PAM-proximal | PAM-distal    | PAM-proximal |
| <i>HER4</i>        | 95.32%      | 47.75%       | 94.98%        | 55.11%       |
| <i>EphA1</i>       | 55.22%      | 91.92%       | 54.23%        | 93.19%       |
| <i>EphA3</i>       | 68.19%      | 66.76%       | 89.43%        | 8.47%        |
| <i>EphA7</i>       | 81.02%      | 12.68%       | 86.04%        | 17.08%       |
| <i>EphB4</i>       | 5.32%       | 6.97%        | 34.70%        | 17.59%       |
| <i>PYK2</i>        | 87.99%      | 21.10%       | 91.38%        | 22.09%       |
| <i>IGF1R</i>       | 33.50%      | 12.46%       | 80.40%        | 22.56%       |
| <i>RON</i>         | 73.84%      | 67.68%       | 88.47%        | 32.74%       |
| <i>C4BPB</i>       | 84.74%      | 47.69%       | 94.07%        | 18.84%       |
| <i>HER3</i>        | 93.11%      | 0.65%        | 96.52%        | 0.77%        |
| <i>LYN</i>         | 49.76%      | 28.78%       | 50.94%        | 15.30%       |
| <i>FLT1</i>        | 64.04%      | 59.18%       | 74.00%        | 23.99%       |
| <i>ARG</i>         | 36.73%      | 85.41%       | 35.91%        | 91.61%       |
| <i>CSK</i>         | 53.58%      | 89.17%       | 49.61%        | 90.95%       |
| <i>FGFR3</i>       | 71.38%      | 16.68%       | 95.79%        | 38.11%       |
| <i>AXL</i>         | 51.22%      | 89.58%       | 49.82%        | 91.24%       |
| <i>CCR5</i>        | 92.09%      | 57.98%       | 96.16%        | 51.21%       |
| <i>EMX1</i>        | 44.86%      | 3.20%        | 72.89%        | 4.32%        |
| Avg. NHEJ accuracy | 63.44±5.75% | 44.76±7.68%  | 74.18±5.22%   | 38.62±7.64%  |

**Supplementary Table S5. The fraction of predictable 1-bp insertion among the total 1-bp insertion in the two human cell lines.**

| <b>Gene</b>  | <b>HeLa cell</b> | <b>HEK 293T cell</b> |
|--------------|------------------|----------------------|
| <i>HER4</i>  | 84.70%           | 93.16%               |
| <i>EphA1</i> | 75.21%           | 63.01%               |
| <i>EphA3</i> | 99.50%           | 98.95%               |
| <i>EphA7</i> | 94.65%           | 95.18%               |
| <i>EphB4</i> | 96.53%           | 94.35%               |
| <i>PYK2</i>  | 39.59%           | 28.09%               |
| <i>IGF1R</i> | 69.07%           | 63.56%               |
| <i>RON</i>   | 99.04%           | 98.22%               |
| <i>C4BPB</i> | 99.45%           | 99.03%               |
| <i>HER3</i>  | 99.72%           | 98.63%               |
| <i>LYN</i>   | 99.20%           | 97.39%               |
| <i>FLT1</i>  | 99.52%           | 99.26%               |
| <i>ARG</i>   | 53.86%           | 53.71%               |
| <i>CSK</i>   | 80.88%           | 81.41%               |
| <i>FGFR3</i> | 41.65%           | 32.73%               |
| <i>AXL</i>   | 46.81%           | 13.33%               |
| <i>CCR5</i>  | 88.31%           | 71.02%               |
| <i>EMX1</i>  | 99.68%           | 99.45%               |
